# Supplementary material for: Analysis of Electrocardiographic Criteria of Right Ventricular Hypertrophy in Patients with Chronic Thromboembolic Pulmonary Hypertension before and after Balloon Pulmonary Angioplasty
Source: MDPI journal article supplement (doi:10.3390/jcm12134196), 2023-06-21
Supplement: s1 [file s1]

Table S1. Electrocardiographic main parameters.

|                                                      | Baseline     | Follow-up    | p-value  |
|------------------------------------------------------|--------------|--------------|----------|
| <b>S &gt; R or S &gt; 40 ms in I, II, III, n (%)</b> | 104 (69%)    | 81 (54%)     | < 0.001* |
| <b>S &gt; R or S &gt; 40 ms in V6, n (%)</b>         | 35 (23%)     | 29 (19%)     | 0.157    |
| <b>R/S V1 &gt; R/S in V3, V4, n (%)</b>              | 36 (24%)     | 15 (10%)     | < 0.001* |
| <b>R/S in V5 : R/S in V1, median (IQR)</b>           | 1.9 (4.8)    | 4.9 (11.4)   | < 0.001* |
| <b>(RI + SIII) - (SI + RIII), mV, median (IQR)</b>   | -0.65 (0.94) | -0.35 (0.89) | < 0.001* |
| <b>R V1, V2 + S I, aVL - S V1, mV, median (IQR)</b>  | 0.6 (0.7)    | 0.3 (0.65)   | < 0.001* |

Annotation: \*: p-values < 0.008 are considered to be statistically significant after Bonferroni correction, IQR: interquartile range

Table S2: Atrial parameters

|                                                 | Baseline  | Follow-up  | p-value |
|-------------------------------------------------|-----------|------------|---------|
| <b>Double-peaked P-wave, n (%)</b>              | 20 (13%)  | 16 (11%)   | 0.405   |
| <b>P dextroatriale, n (%)</b>                   | 60 (40%)  | 24 (16%)   | < 0.001 |
| <b>P sinistrioatriale, n (%)</b>                | 2 (1%)    | 2 (1%)     | 1.000   |
| <b>P biatriale, n (%)</b>                       | 10 (7%)   | 3 (2%)     | 0.008   |
| <b>Supraventricular extrasystoles, n (%)</b>    | 7 (5%)    | 11 (7%)    | 0.285   |
| <b>P-wave amplitude in II, mV, median (IQR)</b> | 0.2 (0.1) | 0.2 (0.05) | < 0.001 |
| <b>Highest P-wave, mV, median (IQR)</b>         | 0.2 (0.1) | 0.2 (0.05) | < 0.001 |
| <b>Longest P-wave, ms, median (IQR)</b>         | 120 (5)   | 120 (10)   | 0.079   |
| <b>Shortest P-wave, ms, median (IQR)</b>        | 80 (10)   | 80 (15)    | 0.755   |
| <b>P-wave dispersion, ms, median (IQR)</b>      | 40 (13)   | 40 (15)    | 0.334   |

Annotation: IQR: interquartile range

Table S3: Ventricular parameters

|                                                   | Baseline | Follow-up | p-value |
|---------------------------------------------------|----------|-----------|---------|
| <b>Right ventricular hypertrophy (SLI), n (%)</b> | 67 (45%) | 40 (27%)  | < 0.001 |
| <b>Left ventricular hypertrophy (SLI), n (%)</b>  | 0 (0%)   | 0 (0%)    |         |
| <b>Biventricular hypertrophy (SLI), n (%)</b>     | 0 (0%)   | 1 (1%)    |         |
| <b>qR pattern in V1, n (%)</b>                    | 24 (16%) | 19 (13%)  | 0.297   |

|                                                 |             |             |        |
|-------------------------------------------------|-------------|-------------|--------|
| RSR` pattern in V1 (QRS > 120 ms), n (%)        | 19 (13%)    | 15 (10%)    | 0.317  |
| Right bundle branch block, n (%)                | 50 (33%)    | 42 (28%)    | 0.074  |
| Complete right bundle branch block, n (%)       | 22 (15%)    | 19 (13%)    | 0.405  |
| Incomplete right bundle branch block, n (%)     | 28 (19%)    | 23 (15%)    | 0.275  |
| Left bundle branch block, n (%)                 | 4 (3%)      | 5 (3%)      | 0.317  |
| Ventricular extrasystoles, n (%)                | 8 (5%)      | 4 (3%)      | 0.206  |
| QRS-interval, ms, Median                        | 95 (20)     | 95 (25)     | 0.224  |
| R-amplitude in I, mV, median (IQR)              | 0.3 (0.29)  | 0.4 (0.25)  | <0.001 |
| R-amplitude in III, mV, median (IQR)            | 0.8 (0.64)  | 0.6 (0.5)   | <0.001 |
| R-amplitude in aVR, mV, median (IQR)            | 0.5 (0.3)   | 0.58 (0.35) | 0.038  |
| R-amplitude in V1, mV, median (IQR)             | 0.3 (0.35)  | 0.2 (0.25)  | <0.001 |
| R-amplitude in V2, mV, median (IQR)             | 0.3 (0.3)   | 0.25 (0.25) | 0.003  |
| R-amplitude in V6, mV, median (IQR)             | 0.8 (0.5)   | 0.8 (0.5)   | 0.041  |
| S-amplitude in I, mV, median (IQR)              | 0.31 (0.35) | 0.25 (0.25) | <0.001 |
| S-amplitude in III, mV, median (IQR)            | 0.15 (0.3)  | 0.1 (0.3)   | 0.946  |
| S-amplitude in aVL, mV, median (IQR)            | 0.45 (0.5)  | 0.3 (0.45)  | <0.001 |
| S-amplitude in V1, mV, median (IQR)             | 0.3 (0.35)  | 0.4 (0.4)   | <0.001 |
| S-amplitude in V3, mV, median (IQR)             | 0.7 (0.64)  | 0.6 (0.54)  | 0.045  |
| S-amplitude in V4, mV, median (IQR)             | 0.65 (0.65) | 0.5 (0.5)   | <0.001 |
| S-amplitude in V5, mV, median (IQR)             | 0.5 (0.45)  | 0.4 (0.4)   | <0.001 |
| S-amplitude in V6, mV, median (IQR)             | 0.3 (0.4)   | 0.2 (0.29)  | <0.001 |
| R/S in V1, median (IQR)                         | 1 (2)       | 0.4 (0.8)   | <0.001 |
| R/S in V5, median (IQR)                         | 1.7 (2)     | 2.4 (2.7)   | <0.001 |
| R/S in V6, median (IQR)                         | 2.4 (2.6)   | 3.3 (4.4)   | <0.001 |
| R V1,2 + S I, aVL - S V1, mV, median (IQR)      | 0.6 (0.7)   | 0.3 (0.65)  | <0.001 |
| R V1 + S V5, V6, mV, median (IQR)               | 0.85 (0.73) | 0.65 (0.56) | <0.001 |
| R-amplitude V1 (QRS < 120 ms), mV, median (IQR) | 0.25 (0.3)  | 0.2 (0.21)  | <0.001 |
| R peak time V1 (QRS < 120 ms), ms, median (IQR) | 50 (30)     | 43 (40)     | <0.001 |
| R V1, V2 + S I, V6 - S V1, mV, median (IQR)     | 0.6 (0.89)  | 0.28 (0.7)  | <0.001 |

Annotation: IQR: interquartile range, SLI: Sokolow-Lyon-Index for ventricular hypertrophy

Table S4: Cut-off values of ventricular parameters

|                                                | <b>Cut-off value</b> | <b>Baseline</b> | <b>Follow-up</b> | <b>p-value</b> |
|------------------------------------------------|----------------------|-----------------|------------------|----------------|
| <b>R-amplitude in I, n (%)</b>                 | ≤ 0.2 mV             | 48 (32%)        | 34 (23%)         | 0.020          |
| <b>R-amplitude in aVR, n (%)</b>               | > 0.4 mV             | 97 (65%)        | 99 (66%)         | 0.746          |
| <b>R-amplitude in V1, n (%)</b>                | > 0.6 mV             | 22 (15%)        | 13 (9%)          | 0.029          |
| <b>R-amplitude in V6, n (%)</b>                | < 0.3 mV             | 3 (2%)          | 5 (3%)           | 0.414          |
| <b>S-amplitude in V1, n (%)</b>                | < 0.2 mV             | 44 (29%)        | 34 (23%)         | 0.077          |
| <b>S-amplitude in V5, n (%)</b>                | > 1.0 mV             | 13 (9%)         | 5 (3%)           | 0.021          |
| <b>S-amplitude in V6, n (%)</b>                | > 0.3 mV             | 68 (45%)        | 44 (29%)         | < 0.001        |
| <b>R/S in V1, n (%)</b>                        | > 1.0                | 55 (37%)        | 25 (17%)         | < 0.001        |
| <b>R/S in V5, n (%)</b>                        | < 0.75               | 18 (12%)        | 13 (9%)          | 0.251          |
| <b>R/S in V6, n (%)</b>                        | < 0.4                | 3 (2%)          | 2 (1%)           | 0.655          |
| <b>R V1 + S V5, V6, n (%)</b>                  | > 1.05 mV            | 48 (32%)        | 27 (18%)         | < 0.001        |
| <b>R peak time V1 (QRS &lt; 120 ms), n (%)</b> | > 35 ms              | 86 (57%)        | 67 (45%)         | 0.002          |
| <b>R V1, V2 + S I, V6 - S V1, n (%)</b>        | > 0.6 mV             | 69 (46%)        | 40 (27%)         | < 0.001        |

Table S5: Repolarisation parameters

|                                                    | <b>Baseline</b> | <b>Follow-Up</b> | <b>p-value</b> |
|----------------------------------------------------|-----------------|------------------|----------------|
| <b>Longest T-wave, ms, median (IQR)</b>            | 300 (80)        | 300 (58)         | 0.044          |
| <b>Shortest T-wave, ms, median (IQR)</b>           | 150 (30)        | 140 (20)         | 0.572          |
| <b>T-wave dispersion, ms, median (IQR)</b>         | 140 (80)        | 140 (58)         | 0.087          |
| <b>T-wave inversion in II, n (%)</b>               | 46 (31%)        | 19 (13%)         | < 0.001        |
| <b>T-wave inversion in III, n (%)</b>              | 73 (49%)        | 49 (33%)         | < 0.001        |
| <b>T-wave inversion in aVF, n (%)</b>              | 61 (41%)        | 26 (17%)         | < 0.001        |
| <b>T-wave inversion in V1, n (%)</b>               | 130 (87%)       | 133 (89%)        | 0.414          |
| <b>T-wave inversion in V2, n (%)</b>               | 76 (51%)        | 68 (45%)         | 0.144          |
| <b>T-wave inversion in V3, n (%)</b>               | 90 (60%)        | 66 (44%)         | < 0.001        |
| <b>T-wave inversions in II, III and aVF, V1-V3</b> | 21 (14%)        | 9 (6%)           | 0.011          |
| <b>T-wave inversions in II, III and aVF</b>        | 46 (31%)        | 18 (12%)         | < 0.001        |

|                                   |          |          |       |
|-----------------------------------|----------|----------|-------|
| <b>T-wave-inversions in V1-V3</b> | 68 (45%) | 53 (35%) | 0.025 |
|-----------------------------------|----------|----------|-------|

Annotation: IQR: interquartile range

Table S6: General electrocardiographic data

|                                                    | <b>Baseline</b> | <b>Follow-Up</b> | <b>p-value</b> |
|----------------------------------------------------|-----------------|------------------|----------------|
| <b>Sinusrhythm, n (%)</b>                          | 148 (99%)       | 143 (95%)        | 0.025          |
| <b>Normocardia, n (%)</b>                          | 123 (82%)       | 131 (87%)        | 0.194          |
| <b>Bradycardia, n (%)</b>                          | 3 (2%)          | 9 (6%)           | 0.083          |
| <b>Tachycardia, n (%)</b>                          | 24 (16%)        | 10 (7%)          | 0.006          |
| <b>First-degree AV block, n (%)</b>                | 6 (4%)          | 4 (3%)           | 0.564          |
| <b>Myocardial infarction, n (%)</b>                | 6 (4%)          | 6 (4%)           |                |
| <b>Heart rate, bpm, median (IQR)</b>               | 84 (21.8)       | 78 (19)          | <0.001         |
| <b>PQ-interval, ms, median (IQR)</b>               | 150 (29)        | 150 (25)         | 0.454          |
| <b>PR-interval, ms, median (IQR)</b>               | 160 (20)        | 145 (41)         |                |
| <b>QT-interval, ms, median (IQR)</b>               | 390 (70)        | 380 (40)         | <0.001         |
| <b>QTc-interval (Bazett), ms, median (IQR)</b>     | 454 (85)        | 432 (44)         | <0.001         |
| <b>QTc-interval (Fridericia), ms, median (IQR)</b> | 428 (77)        | 413 (43)         | <0.001         |
| <b>QTc-interval (Hodges), ms, median (IQR)</b>     | 428 (69)        | 414 (39)         | <0.001         |
| <b>QTc-interval (Framingham), ms, median (IQR)</b> | 390 (70)        | 380 (40)         | <0.001         |

Annotation: IQR: interquartile range

Table S7: Correlations between electrocardiographic and haemodynamic parameters - Baseline

| <b>Parameter 1</b> | <b>Parameter 2</b> | <b>r-value</b> | <b>p-value</b> |
|--------------------|--------------------|----------------|----------------|
| R-amplitude in V1  | mPAP               | 0.473          | < 0.001        |
| S-amplitude in I   | mPAP               | 0.474          | < 0.001        |
| S-amplitude in V1  | mPAP               | -0.401         | < 0.001        |
| S-amplitude in V5  | mPAP               | 0.344          | < 0.001        |
| S-amplitude in V6  | mPAP               | 0.419          | < 0.001        |
| R/S in V1          | mPAP               | 0.464          | < 0.001        |
| R/S in V6          | mPAP               | -0.328         | < 0.001        |

|                                  |      |        |         |
|----------------------------------|------|--------|---------|
| R/S in V5: R/S in V1             | mPAP | -0.434 | < 0.001 |
| (RI + SIII) - (SI + RIII)        | mPAP | -0.331 | < 0.001 |
| R V1, V2 + S I, aVL - S V1       | mPAP | 0.519  | < 0.001 |
| R V1, V2 + S I, V6 - S V1        | mPAP | 0.524  | < 0.001 |
| R V1 + S V5, V6                  | mPAP | 0.471  | < 0.001 |
| R-amplitude in V1 (QRS < 120 ms) | mPAP | 0.458  | < 0.001 |
| R peak time in V1 (QRS < 120 ms) | mPAP | 0.324  | < 0.001 |
| QTc-interval (Bazett)            | mPAP | 0.328  | < 0.001 |
| Highest P-wave                   | PVR  | 0.312  | < 0.001 |
| R-amplitude in V1                | PVR  | 0.522  | < 0.001 |
| S-amplitude in I                 | PVR  | 0.372  | < 0.001 |
| S-amplitude in V1                | PVR  | -0.409 | < 0.001 |
| S-amplitude in V5                | PVR  | 0.322  | < 0.001 |
| S-amplitude in V6                | PVR  | 0.441  | < 0.001 |
| R/S in V1                        | PVR  | 0.518  | < 0.001 |
| R/S in V6                        | PVR  | -0.384 | < 0.001 |
| R/S in V5 : R/S in V1            | PVR  | -0.501 | < 0.001 |
| R V1, V2 + S I, aVL - S V1       | PVR  | 0.491  | < 0.001 |
| R V1, V2 + S I, V6 - S V1        | PVR  | 0.516  | < 0.001 |
| R V1 + S V5, V6                  | PVR  | 0.472  | < 0.001 |
| R-amplitude in V1 (QRS < 120 ms) | PVR  | 0.496  | < 0.001 |
| R peak time in V1 (QRS < 120 ms) | PVR  | 0.306  | < 0.001 |
| QTc-interval (Bazett)            | PVR  | 0.447  | < 0.001 |
| QTc-interval (Fridericia)        | PVR  | 0.384  | < 0.001 |
| QTc-interval (Hodges)            | PVR  | 0.419  | < 0.001 |
| S-amplitude in V3                | RAP  | -0.311 | < 0.001 |
| S-amplitude in V6                | RAP  | 0.315  | < 0.001 |
| R/S in V6                        | RAP  | -0.350 | < 0.001 |
| R peak time in V1 (QRS < 120 ms) | RAP  | 0.304  | < 0.001 |

Annotation:  $r = 0.30 - 0.49$ ,  $r = 0.50 - 0.69$ , mPAP: mean pulmonary artery pressure, PVR: pulmonary vascular resistance, RAP: right atrial pressure

Table S8: Correlations between electrocardiographic and haemodynamic parameters – Follow-up

| Parameter 1                | Parameter 2 | r-value | p-value |
|----------------------------|-------------|---------|---------|
| S-amplitude in I           | mPAP        | 0.356   | < 0.001 |
| S-amplitude in V1          | mPAP        | -0.337  | < 0.001 |
| S-amplitude in V6          | mPAP        | 0.408   | < 0.001 |
| R/S in V1                  | mPAP        | 0.350   | < 0.001 |
| R/S in V5 : R/S in V1      | mPAP        | -0.359  | < 0.001 |
| R V1, V2 + S I, aVL - S V1 | mPAP        | 0.407   | < 0.001 |
| R V1, V2 + S I, V6 - S V1  | mPAP        | 0.423   | < 0.001 |
| R V1 + S V5, V6            | mPAP        | 0.342   | < 0.001 |
| QTc-interval (Bazett)      | mPAP        | 0.322   | < 0.001 |
| QTc-interval (Hodges)      | mPAP        | 0.318   | < 0.001 |
| S-amplitude in I           | PVR         | 0.329   | < 0.001 |
| S-amplitude in V1          | PVR         | -0.344  | < 0.001 |
| S-amplitude in V6          | PVR         | 0.394   | < 0.001 |
| R/S in V1                  | PVR         | 0.335   | < 0.001 |
| R/S in V6                  | PVR         | -0.305  | < 0.001 |
| R/S in V5 : R/S in V1      | PVR         | -0.336  | < 0.001 |
| R V1, V2 + S I, aVL - S V1 | PVR         | 0.372   | < 0.001 |
| R V1, V2 + S I, V6 - S V1  | PVR         | 0.393   | < 0.001 |
| QTc-interval (Bazett)      | PVR         | 0.357   | < 0.001 |
| QTc-interval (Fridericia)  | PVR         | 0.315   | < 0.001 |

Annotation:  $r = 0.30 - 0.49$ , mPAP: mean pulmonary artery pressure, PVR: pulmonary vascular resistance

Table S9: Correlations between changes in electrocardiographic and changes in haemodynamic parameters

| Parameter 1            | Parameter 2 | r-value | p-value |
|------------------------|-------------|---------|---------|
| P-wave amplitude in II | mPAP        | 0.379   | < 0.001 |
| Highest P-wave         | mPAP        | 0.407   | < 0.001 |
| R-amplitude in II      | mPAP        | 0.383   | < 0.001 |

|                                  |      |        |         |
|----------------------------------|------|--------|---------|
| R/S in V6                        | mPAP | -0.381 | < 0.001 |
| R V1, V2 + S I, aVL - S V1       | mPAP | 0.488  | < 0.001 |
| R V1, V2 + S I, V6 - S V1        | mPAP | 0.482  | < 0.001 |
| QTc-interval (Bazett)            | mPAP | 0.302  | < 0.001 |
| P-wave amplitude in II           | PVR  | 0.339  | < 0.001 |
| Highest P-wave                   | PVR  | 0.397  | < 0.001 |
| R-amplitude in V1                | PVR  | 0.422  | < 0.001 |
| R-amplitude in V2                | PVR  | 0.335  | < 0.001 |
| R-amplitude in V6                | PVR  | -0.387 | < 0.001 |
| S-amplitude in V4                | PVR  | 0.309  | < 0.001 |
| S-amplitude in V6                | PVR  | 0.322  | < 0.001 |
| R/S in V1                        | PVR  | 0.454  | < 0.001 |
| R/S in V5                        | PVR  | -0.305 | < 0.001 |
| R/S in V6                        | PVR  | -0.419 | < 0.001 |
| R/S in V5 : R/S in V1            | PVR  | -0.357 | < 0.001 |
| R V1, V2 + S I, aVL - S V1       | PVR  | 0.418  | < 0.001 |
| R V1, V2 + S I, V6 - S V1        | PVR  | 0.494  | < 0.001 |
| R V1 + S V5, V6                  | PVR  | 0.360  | < 0.001 |
| R-amplitude in V1 (QRS < 120 ms) | PVR  | 0.493  | < 0.001 |
| R peak time in V1 (QRS < 120 ms) | PVR  | 0.306  | < 0.001 |
| R-amplitude in V6                | CO   | 0.318  | < 0.001 |
| R/S in V1                        | CO   | -0.335 | < 0.001 |

Annotation:  $r = 0.30 - 0.49$ , mPAP: mean pulmonary artery pressure, PVR: pulmonary vascular resistance, CO: cardiac output

Table S10: Subgroups patient data

|                     | Entire cohort |           | mPAP $\geq 25$ |           | mPAP = 21-24 |           | mPAP $\leq 20$ |           |
|---------------------|---------------|-----------|----------------|-----------|--------------|-----------|----------------|-----------|
|                     | Baseline      | Follow-up | Baseline       | Follow-up | Baseline     | Follow-up | Baseline       | Follow-up |
| <b>patients, n</b>  | 150           | 150       | 103            | 103       | 25           | 25        | 19             | 19        |
| <b>sex, male, n</b> | 71            | 71        | 48             | 48        | 13           | 13        | 9              | 9         |
| <b>Sex male, %</b>  | 47%           | 47%       | 47%            | 47%       | 52%          | 52%       | 47%            | 47%       |

|                                        |         |         |         |         |         |         |         |         |
|----------------------------------------|---------|---------|---------|---------|---------|---------|---------|---------|
| <b>sex, female, n</b>                  | 79      | 79      | 55      | 55      | 12      | 12      | 10      | 10      |
| <b>sex, female, %</b>                  | 53%     | 53%     | 53%     | 53%     | 48%     | 48%     | 53%     | 53%     |
| <b>Age, years, span</b>                | 67      | 67      | 56      | 55      | 58      | 57      | 61      | 61      |
| <b>Age, years, Minimum - maximum</b>   | 15 - 82 | 16 - 83 | 26 - 82 | 28 - 83 | 21 - 79 | 23 - 80 | 15 - 76 | 16 - 77 |
| <b>Age, years, median</b>              | 63.5    | 65.3    | 64      | 65.6    | 61.1    | 62.4    | 63.5    | 65      |
| <b>Age, years, interquartile range</b> | (18.8)  | (18.6)  | (17.5)  | (17.5)  | (21.2)  | (21.3)  | (18.6)  | (18.3)  |

Annotation: mPAP: mean pulmonary artery pressure

Table S11: Subgroups haemodynamic data

|                                                          | Entire cohort |           |     | mPAP ≥ 25 |           |     | mPAP = 21-24 |           |     | mPAP ≤ 20 |           |     |
|----------------------------------------------------------|---------------|-----------|-----|-----------|-----------|-----|--------------|-----------|-----|-----------|-----------|-----|
|                                                          | Baseline      | Follow-up | p   | Baseline  | Follow-up | p   | Baseline     | Follow-up | p   | Baseline  | Follow-up | p   |
| <b>RAP, mmHg, median</b>                                 | 6             | 5         | *** | 7         | 5         | *** | 6            | 4         | *   | 6         | 3         | **  |
| <b>RAP, mmHg, interquartile range</b>                    | (4)           | (3)       | *** | (5)       | (3.8)     | *** | (3)          | (1.3)     | *   | (3.8)     | (1)       | **  |
| <b>mPAP, mmHg, median</b>                                | 40            | 29        | *** | 41        | 32        | *** | 35           | 23        | *** | 28        | 19        | *** |
| <b>mPAP, mmHg, interquartile range</b>                   | (13.8)        | (12)      | *** | (12)      | (11)      | *** | (9)          | (2)       | *** | (9.5)     | (1)       | *** |
| <b>CO, L/min, median</b>                                 | 4.7           | 5         | **  | 4.6       | 5         | **  | 4.9          | 5         | -   | 5.3       | 5.1       | -   |
| <b>CO, L/min, interquartile range</b>                    | (1.6)         | (1.4)     | **  | (1.6)     | (1.5)     | **  | (1.6)        | (1.3)     | -   | (0.7)     | (1.1)     | -   |
| <b>PVR, dyn*sek*cm<sup>-5</sup>, median</b>              | 536           | 304       | *** | 565       | 369       | *** | 431          | 241       | *** | 307       | 164       | *** |
| <b>PVR, dyn*sek*cm<sup>-5</sup>, interquartile range</b> | (312)         | (206)     | *** | (283)     | (236)     | *** | (254)        | (64)      | *** | (142)     | (53)      | *** |

Annotation: RAP: right atrial pressure, mPAP: mean pulmonary artery pressure, CO: cardiac output, PVR: pulmonary vascular resistance, -: p > 0.05, \*: p < 0.05, \*\*: p < 0.01, \*\*\*: p < 0.001

Table S12: Subgroups electrocardiographic main parameters

|                                                  | Entire cohort |           |      | mPAP ≥ 25 |           |     | mPAP 21-24 |           |   | mPAP ≤ 20 |           |   |
|--------------------------------------------------|---------------|-----------|------|-----------|-----------|-----|------------|-----------|---|-----------|-----------|---|
|                                                  | Baseline      | Follow-up | p    | Baseline  | Follow-up | p   | Baseline   | Follow-up | p | Baseline  | Follow-up | p |
| <b>S &gt; R or S &gt; 40 ms in I, II, III, n</b> | 104           | 81        | ***# | 77        | 64        | **  | 15         | 8         | * | 9         | 6         | - |
| <b>S &gt; R or S &gt; 40 ms in I, II, III, %</b> | 69%           | 54%       | ***# | 75%       | 62%       | **  | 60%        | 32%       | * | 47%       | 32%       | - |
| <b>S &gt; R or S &gt; 40 ms in V6, n</b>         | 35            | 29        | -    | 29        | 23        | -   | 3          | 3         | - | 1         | 1         |   |
| <b>S &gt; R or S &gt; 40 ms in V6, %</b>         | 23%           | 19%       | -    | 28%       | 22%       | -   | 12%        | 12%       | - | 5%        | 5%        |   |
| <b>R/S V1 &gt; R/S in V3, V4, n</b>              | 36            | 15        | ***# | 30        | 15        | *   | 5          | 0         |   | 1         | 0         |   |
| <b>R/S V1 &gt; R/S in V3, V4, %</b>              | 24%           | 10%       | ***# | 29%       | 15%       | *   | 20%        | 0%        |   | 5%        | 0%        |   |
| <b>R/S in V5 : R/S in V1, median</b>             | 1.9           | 4.9       | ***# | 1.5       | 3.6       | **# | 3          | 6.1       | - | 3.7       | 8         | * |



|                                                     |        |        |      |        |        |      |        |        |      |        |        |      |
|-----------------------------------------------------|--------|--------|------|--------|--------|------|--------|--------|------|--------|--------|------|
| R/S in V5 : R/S in V1, interquartile range          | (4.8)  | (11.4) | ***# | (2.9)  | (8.5)  | **#  | (8.2)  | (14.7) | -    | (7.6)  | (9.2)  | *    |
| (RI + SIII) - (SI + RIII), mV, median               | -0.65  | -0.35  | ***# | -0.65  | -0.4   | ***# | -0.45  | -0.2   | **   | -0.65  | -0.3   | -    |
| (RI + SIII) - (SI + RIII), mV, interquartile range  | (0.94) | (0.89) | ***# | (0.93) | (0.88) | ***# | (0.8)  | (0.75) | **   | (1.23) | (0.68) | -    |
| R V1, V2 + S I, aVL - S V1, mV, median              | 0.6    | 0.3    | ***# | 0.7    | 0.4    | ***# | 0.43   | 0.2    | ***# | 0.23   | 0.05   | ***# |
| R V1, V2 + S I, aVL - S V1, mV, interquartile range | (0.7)  | (0.65) | ***# | (0.65) | (0.7)  | ***# | (0.59) | (0.3)  | ***# | (0.5)  | (0.4)  | ***# |

Annotation: mPAP: mean pulmonary artery pressure. -: p > 0.05, \*: p < 0.05, \*\*: p < 0.01, \*\*\*: p < 0.001, #: p-values < 0.008 are considered to be statistically significant after Bonferroni correction

Table S13: Subgroups electrocardiographic main parameters – cut-off values

|                                     |               | Entire cohort |           |      | mPAP ≥ 25 |           |      | mPAP = 21-24 |           |   | mPAP ≤ 20 |           |   |
|-------------------------------------|---------------|---------------|-----------|------|-----------|-----------|------|--------------|-----------|---|-----------|-----------|---|
|                                     | Cut-off value | Base-<br>line | Follow-up | p    | Baseline  | Follow-up | p    | Baseline     | Follow-up | p | Baseline  | Follow-up | p |
| S > R or S > 40 ms in I, II, III, n | Positive      | 104           | 81        | ***# | 77        | 64        | **   | 15           | 8         | * | 9         | 6         | - |
| S > R or S > 40 ms in I, II, III, % | Positive      | 69%           | 54%       | ***# | 75%       | 62%       | **   | 60%          | 32%       | * | 47%       | 32%       | - |
| S > R or S > 40 ms in V6, n         | Positive      | 35            | 29        | -    | 29        | 23        | -    | 3            | 3         | - | 1         | 1         |   |
| S > R or S > 40 ms in V6, %         | Positive      | 23%           | 19%       | -    | 28%       | 22%       | -    | 12%          | 12%       | - | 5%        | 5%        |   |
| R/S V1 > R/S in V3 or V4, n         | Positive      | 36            | 15        | ***# | 30        | 15        | *    | 5            | 0         |   | 1         | 0         |   |
| R/S V1 > R/S in V3 or V4, %         | Positive      | 24%           | 10%       | ***# | 29%       | 15%       | *    | 20%          | 0%        |   | 5%        | 0%        |   |
| R/S in V5 : R/S in V1, n            | < 0.04        | 0             | 0         |      | 0         | 0         |      | 0            | 0         |   | 0         | 0         |   |
| R/S in V5 : R/S in V1, %            | < 0.04        | 0%            | 0%        |      | 0%        | 0%        |      | 0%           | 0%        |   | 0%        | 0%        |   |
| (RI + SIII) - (SI + RIII), n        | < 1.5 mV      | 148           | 147       | -    | 103       | 101       |      | 25           | 25        |   | 17        | 18        | - |
| (RI + SIII) - (SI + RIII), %        | < 1.5 mV      | 99%           | 98%       | -    | 100%      | 98%       |      | 100%         | 100%      |   | 90%       | 95%       | - |
| R V1, V2 + S I, aVL - S V1, n       | > 0.6 mV      | 71            | 44        | ***# | 56        | 39        | ***# | 8            | 2         | * | 4         | 0         |   |
| R V1, V2 + S I, aVL - S V1, %       | > 0.6 mV      | 47%           | 29%       | ***# | 54%       | 38%       | ***# | 32%          | 8%        | * | 21%       | 0%        |   |

Annotation: mPAP: mean pulmonary artery pressure. -: p > 0.05, \*: p < 0.05, \*\*: p < 0.01, \*\*\*: p < 0.001, #: p-values < 0.008 are considered to be statistically significant after Bonferroni correction

Table S14: Subgroups QRS axis

|                    | Entire cohort |           |         | mPAP ≥ 25 |           |         | mPAP = 21-24 |           |       | mPAP ≤ 20 |           |       |
|--------------------|---------------|-----------|---------|-----------|-----------|---------|--------------|-----------|-------|-----------|-----------|-------|
|                    | Baseline      | Follow-up | p       | Baseline  | Follow-up | p       | Baseline     | Follow-up | p     | Baseline  | Follow-up | p     |
| QRS axis > 90°, n  | 63            | 34        | < 0.001 | 49        | 26        | < 0.001 | 9            | 4         | 0.059 | 3         | 2         | 0.564 |
| QRS axis > 90°, %  | 42%           | 23%       | < 0.001 | 48%       | 25%       | < 0.001 | 36%          | 16%       | 0.059 | 16%       | 11%       | 0.564 |
| QRS axis > 120°, n | 23            | 10        | 0.002   | 20        | 7         | < 0.001 | 2            | 1         | 0.317 | 0         | 1         |       |

|                                                |     |     |         |     |     |         |     |     |       |     |     |       |
|------------------------------------------------|-----|-----|---------|-----|-----|---------|-----|-----|-------|-----|-----|-------|
| QRS axis > 120°, %                             | 15% | 7%  | 0.002   | 19% | 7%  | < 0.001 | 8%  | 4%  | 0.317 | 0%  | 5%  |       |
| SISIISIII pattern, n                           | 11  | 12  | 0.705   | 9   | 11  | 0.317   | 0   | 0   |       | 2   | 1   | 0.564 |
| SISIISIII pattern, %                           | 7%  | 8%  | 0.705   | 9%  | 11% | 0.317   | 0%  | 0%  |       | 11% | 5%  | 0.564 |
| SIQIII pattern, n                              | 10  | 2   | 0.005   | 5   | 0   |         | 2   | 1   | 0.317 | 2   | 0   |       |
| SIQIII pattern, %                              | 7%  | 1%  | 0.005   | 5%  | 0%  |         | 8%  | 4%  | 0.317 | 11% | 0%  |       |
| QRS axis associated with right heart strain, n | 84  | 48  | < 0.001 | 63  | 37  | < 0.001 | 11  | 5   | 0.034 | 7   | 3   | 0.046 |
| QRS axis associated with right heart strain, % | 56% | 32% | < 0.001 | 61% | 36% | < 0.001 | 44% | 20% | 0.034 | 37% | 16% | 0.046 |
| Left axis deviation, n                         | 12  | 22  | 0.004   | 8   | 16  | 0.011   | 2   | 4   | 0.157 | 2   | 2   |       |
| Left axis deviation, %                         | 8%  | 15% | 0.004   | 8%  | 16% | 0.011   | 8%  | 16% | 0.157 | 11% | 11% |       |
| Normal axis, n                                 | 53  | 80  | < 0.001 | 32  | 50  | < 0.001 | 12  | 16  | 0.206 | 10  | 14  | 0.046 |
| Normal axis, %                                 | 35% | 53% | < 0.001 | 31% | 49% | < 0.001 | 48% | 64% | 0.206 | 53% | 74% | 0.046 |

Annotation: mPAP: mean pulmonary artery pressure

Table S15: Subgroups atrial parameters

|                                                 | Entire cohort |           |     | mPAP ≥ 25 |           |     | mPAP = 21-24 |           |    | mPAP ≤ 20 |           |    |
|-------------------------------------------------|---------------|-----------|-----|-----------|-----------|-----|--------------|-----------|----|-----------|-----------|----|
|                                                 | Baseline      | Follow-up | p   | Baseline  | Follow-up | p   | Baseline     | Follow-up | p  | Baseline  | Follow-up | p  |
| Double-peaked P-wave, n                         | 20            | 16        | -   | 14        | 13        | -   | 5            | 2         | -  | 1         | 1         |    |
| Double-peaked P-wave, %                         | 13%           | 11%       | -   | 14%       | 13%       | -   | 20%          | 8%        | -  | 5%        | 5%        |    |
| P dextroatriale, n                              | 60            | 24        | *** | 45        | 19        | *** | 7            | 2         | *  | 6         | 1         | *  |
| P dextroatriale, %                              | 40%           | 16%       | *** | 44%       | 19%       | *** | 29%          | 8%        | *  | 32%       | 5%        | *  |
| P sinistroatriale, n                            | 2             | 2         | -   | 2         | 2         | -   | 0            | 0         |    | 0         | 0         |    |
| P sinistroatriale, %                            | 1%            | 1%        | -   | 2%        | 2%        | -   | 0%           | 0%        |    | 0%        | 0%        |    |
| P biatriale, n                                  | 10            | 3         | **  | 6         | 2         | *   | 3            | 0         |    | 0         | 0         |    |
| P biatriale, %                                  | 7%            | 2%        | **  | 6%        | 2%        | *   | 12%          | 0%        |    | 0%        | 0%        |    |
| Supraventricular extrasystoles, n               | 7             | 11        | -   | 4         | 11        | *   | 0            | 0         |    | 3         | 0         |    |
| Supraventricular extrasystoles, %               | 5%            | 7%        | -   | 4%        | 11%       | *   | 0%           | 0%        |    | 16%       | 0%        |    |
| P-wave amplitude in II, mV, median              | 0.2           | 0.2       | *** | 0.2       | 0.2       | *** | 0.2          | 0.2       | ** | 0.2       | 0.15      | ** |
| P-wave amplitude in II, mV, interquartile range | (0.1)         | (0.05)    | *** | (0.1)     | (0.05)    | *** | (0.08)       | (0.1)     | ** | (0.13)    | (0.1)     | ** |

|                                            |       |        |     |       |        |     |        |       |    |        |       |    |
|--------------------------------------------|-------|--------|-----|-------|--------|-----|--------|-------|----|--------|-------|----|
| Highest P-wave, mV, median                 | 0.2   | 0.2    | *** | 0.2   | 0.2    | *** | 0.2    | 0.2   | ** | 0.2    | 0.15  | ** |
| Highest P-wave, mV, interquartile range    | (0.1) | (0.05) | *** | (0.1) | (0.05) | *** | (0.08) | (0.1) | ** | (0.13) | (0.1) | ** |
| Longest P-wave, ms, median                 | 120   | 120    | *   | 120   | 120    | -   | 120    | 120   | -  | 120    | 110   | *  |
| Longest P-wave, ms, interquartile range    | (5)   | (10)   | *   | (0)   | (20)   | -   | (11)   | (13)  | -  | (10)   | (20)  | *  |
| Shortest P-wave, ms, median                | 80    | 80     | -   | 80    | 80     | -   | 70     | 75    | -  | 80     | 80    | -  |
| Shortest P-wave, ms, interquartile range   | (10)  | (15)   | -   | (15)  | (20)   | -   | (20)   | (20)  | -  | (20)   | (20)  | -  |
| P-wave dispersion, ms, median              | 40    | 40     | -   | 40    | 40     | -   | 40     | 40    | -  | 40     | 40    | -  |
| P-wave dispersion, ms, interquartile range | (13)  | (15)   | -   | (10)  | (10)   | -   | (26)   | (5)   | -  | (20)   | (35)  | -  |

Annotation: mPAP: mean pulmonary artery pressure, -: p > 0.05, \*: p < 0.05, \*\*: p < 0.01, \*\*\*: p < 0.001

Table S16: Subgroups atrial parameters - cut-off values

|                           | Cut-off value | Entire cohort |           |     | mPAP ≥ 25 |           |     | mPAP = 21-24 |           |   | mPAP ≤ 20 |           |   |
|---------------------------|---------------|---------------|-----------|-----|-----------|-----------|-----|--------------|-----------|---|-----------|-----------|---|
|                           |               | Baseline      | Follow-up | p   | Baseline  | Follow-up | p   | Baseline     | Follow-up | p | Baseline  | Follow-up | p |
| P-wave amplitude in II, n | ≥ 0,25 mV     | 48            | 17        | *** | 36        | 12        | *** | 6            | 1         | * | 5         | 1         | * |
| P-wave amplitude in II, % | ≥ 0,25 mV     | 32%           | 11%       | *** | 35%       | 12%       | *** | 24%          | 4%        | * | 26%       | 5%        | * |

Annotation: mPAP: mean pulmonary artery pressure, -: p > 0.05, \*: p < 0.05, \*\*: p < 0.01, \*\*\*: p < 0.001

Table S17: Subgroups ventricular parameters – cut-off values

|                       | Cut-off value | Entire cohort |           |   | mPAP ≥ 25 |           |   | mPAP = 21-24 |           |   | mPAP ≤ 20 |           |   |
|-----------------------|---------------|---------------|-----------|---|-----------|-----------|---|--------------|-----------|---|-----------|-----------|---|
|                       |               | Baseline      | Follow-up | p | Baseline  | Follow-up | p | Baseline     | Follow-up | p | Baseline  | Follow-up | p |
| R-amplitude in I, n   | ≤ 0,2 mV      | 48            | 34        | * | 31        | 23        | - | 8            | 5         | - | 9         | 4         | - |
| R-amplitude in I, %   | ≤ 0,2 mV      | 32%           | 23%       | * | 30%       | 22%       | - | 32%          | 20%       | - | 47%       | 21%       | - |
| R-amplitude in aVR, n | > 0,4 mV      | 97            | 99        | - | 63        | 63        | - | 18           | 21        | - | 15        | 14        | - |
| R-amplitude in aVR, % | > 0,4 mV      | 65%           | 66%       | - | 61%       | 61%       | - | 72%          | 84%       | - | 79%       | 74%       | - |
| R-amplitude in V1, n  | > 0,6 mV      | 22            | 13        | * | 18        | 10        | * | 3            | 1         | - | 0         | 0         | - |
| R-amplitude in V1, %  | > 0,6 mV      | 15%           | 9%        | * | 18%       | 10%       | * | 12%          | 4%        | - | 0%        | 0%        | - |
| R-amplitude in V6, n  | < 0,3 mV      | 3             | 5         | - | 2         | 4         | - | 0            | 1         | - | 1         | 0         | - |
| R-amplitude in V6, %  | < 0,3 mV      | 2%            | 3%        | - | 2%        | 4%        | - | 0%           | 4%        | - | 5%        | 0%        | - |
| S-amplitude in V1, n  | < 0,2 mV      | 44            | 34        | * | 36        | 30        | - | 4            | 2         | - | 2         | 1         | - |
| S-amplitude in V1, %  | < 0,2 mV      | 29%           | 23%       | * | 35%       | 29%       | - | 16%          | 8%        | - | 11%       | 5%        | - |

|                                  |           |     |     |         |     |         |     |        |     |   |
|----------------------------------|-----------|-----|-----|---------|-----|---------|-----|--------|-----|---|
| S-amplitude in V5, n             | > 1,0 mV  | 13  | 5   | * 12    | 5   | * 1     | 0   | 0      | 0   |   |
| S-amplitude in V5, %             | > 1,0 mV  | 9%  | 3%  | * 12%   | 5%  | * 4%    | 0%  | 0      | 0%  |   |
| S-amplitude in V6, n             | > 0,3 mV  | 68  | 44  | *** 51  | 38  | * 10    | 3   | ** 5   | 1   | * |
| S-amplitude in V6, %             | > 0,3 mV  | 45% | 29% | *** 50% | 37% | * 40%   | 12% | ** 26% | 5%  | * |
| R/S in V1, n                     | > 1,0     | 55  | 25  | *** 46  | 22  | *** 7   | 2   | * 1    | 0   |   |
| R/S in V1, %                     | > 1,0     | 37% | 17% | *** 45% | 21% | *** 28% | 4%  | * 5%   | 0%  |   |
| R/S in V5, n                     | < 0,75    | 18  | 13  | - 10    | 9   | - 5     | 2   | - 2    | 1   | - |
| R/S in V5, %                     | < 0,75    | 12% | 9%  | - 10%   | 9%  | - 20%   | 8%  | - 11%  | 5%  | - |
| R/S in V6, n                     | < 0,4     | 3   | 2   | - 2     | 2   | - 0     | 0   | 1      | 0   |   |
| R/S in V6, %                     | < 0,4     | 2%  | 1%  | - 2%    | 2%  | - 0%    | 0%  | 5%     | 0%  |   |
| R V1 + S V5, V6, n               | > 1,05 mV | 48  | 27  | *** 38  | 22  | ** 7    | 2   | - 1    | 1   | - |
| R V1 + S V5, V6, %               | > 1,05 mV | 32% | 18% | *** 37% | 21% | ** 28%  | 8%  | - 5%   | 5%  | - |
| R peak time V1 (QRS < 120 ms), n | > 35 ms   | 86  | 67  | ** 65   | 52  | * 14    | 9   | - 5    | 4   | - |
| R peak time V1 (QRS < 120 ms), % | > 35 ms   | 57% | 45% | ** 63%  | 51% | * 56%   | 36% | - 26%  | 21% | - |
| R V1, V2 + S I, V6 - S V1, n     | > 0,6 mV  | 71  | 44  | *** 56  | 39  | *** 8   | 2   | * 4    | 0   |   |
| R V1, V2 + S I, V6 - S V1, %     | > 0,6 mV  | 47% | 29% | *** 54% | 38% | *** 32% | 8%  | * 21%  | 0%  |   |

Annotation: mPAP: mean pulmonary artery pressure, -: p > 0.05, \*: p < 0.05, \*\*: p < 0.01, \*\*\*: p < 0.001

Table S18: Subgroups ventricular parameters

|                                        | Entire cohort |           |     | mPAP ≥ 25 |           |    | mPAP = 21-24 |           |   | mPAP ≤ 20 |           |   |
|----------------------------------------|---------------|-----------|-----|-----------|-----------|----|--------------|-----------|---|-----------|-----------|---|
|                                        | Baseline      | Follow-up | p   | Baseline  | Follow-up | p  | Baseline     | Follow-up | p | Baseline  | Follow-up | p |
| Right ventricular hypertrophy (SLI), n | 67            | 40        | *** | 50        | 33        | ** | 10           | 3         | * | 5         | 2         | - |
| Right ventricular hypertrophy (SLI), % | 45%           | 27%       | *** | 49%       | 32%       | ** | 40%          | 12%       | * | 26%       | 11%       | - |
| Left ventricular hypertrophy (SLI), n  | 0             | 0         |     | 0         | 0         |    | 0            | 0         |   | 0         | 0         |   |
| Left ventricular hypertrophy (SLI), %  | 0%            | 0%        |     | 0%        | 0%        |    | 0%           | 0%        |   | 0%        | 0%        |   |
| Biventricular hypertrophy (SLI), n     | 0             | 1         |     | 0         | 1         |    | 0            | 0         |   | 0         | 0         |   |
| Biventricular hypertrophy (SLI), %     | 0%            | 1%        |     | 0%        | 1%        |    | 0%           | 0%        |   | 0%        | 0%        |   |
| qR pattern in V1, n                    | 24            | 19        | -   | 17        | 16        | -  | 3            | 2         | - | 2         | 0         |   |
| qR pattern in V1, %                    | 16%           | 13%       | -   | 17%       | 16%       | -  | 12%          | 8%        | - | 11%       | 0%        |   |
| RSR' in V1 (QRS > 120 ms), n           | 19            | 15        | -   | 15        | 12        | -  | 2            | 2         |   | 1         | 0         |   |

|                                         |        |        |            |        |            |        |           |        |   |
|-----------------------------------------|--------|--------|------------|--------|------------|--------|-----------|--------|---|
| RSR` in V1 (QRS > 120 ms), %            | 13%    | 10%    | - 15%      | 12%    | - 8%       | 8%     | 5%        | 0%     |   |
| Right bundle branch block, n            | 50     | 42     | - 40       | 33     | - 6        | 5      | - 3       | 3      | - |
| Right bundle branch block, %            | 34%    | 28%    | - 39%      | 32%    | - 24%      | 20%    | - 16%     | 16%    | - |
| Complete right bundle branch block, n   | 22     | 19     | - 18       | 16     | - 2        | 2      | 1         | 0      |   |
| Complete right bundle branch block, %   | 15%    | 13%    | - 18%      | 16%    | - 8%       | 8%     | 5%        | 0%     |   |
| Incomplete right bundle branch block, n | 28     | 23     | - 22       | 17     | - 4        | 3      | - 2       | 3      | - |
| Incomplete right bundle branch block, % | 19%    | 15%    | - 21%      | 17%    | - 16%      | 12%    | - 11%     | 16%    | - |
| Left bundle branch block, n             | 4      | 5      | - 2        | 2      | 2          | 2      | 0         | 1      |   |
| Left bundle branch block, %             | 3%     | 3%     | - 2%       | 2%     | 8%         | 8%     | 0%        | 5%     |   |
| Ventricular extrasystoles, n            | 8      | 4      | - 6        | 4      | - 2        | 0      | 0         | 0      |   |
| Ventricular extrasystoles, %            | 5%     | 3%     | - 6%       | 4%     | - 8%       | 0%     | 0%        | 0%     |   |
| QRS-interval, ms, median                | 95     | 95     | - 100      | 95     | - 90       | 90     | - 95      | 90     | - |
| QRS-interval, ms, IQR                   | (20)   | (25)   | - (20)     | (20)   | - (20)     | (20)   | - (18)    | (18)   | - |
| R-amplitude in I, mV, median            | 0.3    | 0.4    | *** 0.3    | 0.35   | ** 0.4     | 0.5    | ** 0.3    | 0.3    | - |
| R-amplitude in I, mV, IQR               | (0.29) | (0.25) | *** (0.25) | (0.25) | ** (0.3)   | (0.4)  | ** (0.25) | (0.18) | - |
| R-amplitude in III, mV, median          | 0.8    | 0.6    | *** 0.8    | 0.6    | *** 0.7    | 0.6    | - 0.8     | 0.5    | - |
| R-amplitude in III, mV, IQR             | (0.64) | (0.5)  | *** (0.65) | (0.53) | *** (0.4)  | (0.55) | - (0.68)  | (0.43) | - |
| R-amplitude in aVR, mV, median          | 0.5    | 0.58   | * 0.5      | 0.55   | - 0.55     | 0.65   | - 0.65    | 0.6    | - |
| R-amplitude in aVR, mV, IQR             | (0.3)  | (0.35) | * (0.28)   | (0.35) | - (0.25)   | (0.2)  | - (0.3)   | (0.3)  | - |
| R-amplitude in V1, mV, median           | 0.3    | 0.2    | *** 0.33   | 0.2    | *** 0.2    | 0.15   | * 0.2     | 0.1    | - |
| R-amplitude in V1, mV, IQR              | (0.35) | (0.25) | *** (0.3)  | (0.26) | *** (0.25) | (0.21) | * (0.1)   | (0.1)  | - |
| R-amplitude in V2, mV, median           | 0.3    | 0.25   | ** 0.3     | 0.25   | - 0.25     | 0.25   | - 0.38    | 0.3    | * |
| R-amplitude in V2, mV, IQR              | (0.3)  | (0.25) | ** (0.4)   | (0.31) | - (0.31)   | (0.15) | - (0.15)  | (0.25) | * |
| R-amplitude in V6, mV, median           | 0.8    | 0.8    | * 0.8      | 0.78   | * 0.85     | 0.8    | - 0.85    | 0.85   | - |
| R-amplitude in V6, mV, IQR              | (0.5)  | (0.5)  | * (0.45)   | (0.54) | * (0.5)    | (0.35) | - (0.43)  | (0.58) | - |
| S-amplitude in I, mV, median            | 0.31   | 0.25   | *** 0.4    | 0.3    | *** 0.3    | 0.15   | - 0.2     | 0.1    | * |
| S-amplitude in I, mV, IQR               | (0.35) | (0.25) | *** (0.35) | (0.25) | *** (0.3)  | (0.2)  | - (0.23)  | (0.2)  | * |
| S-amplitude in III, mV, median          | 0.15   | 0.1    | - 0.15     | 0.1    | - 0.1      | 0.1    | - 0.1     | 0      | - |
| S-amplitude in III, mV, IQR             | (0.3)  | (0.3)  | - (0.3)    | (0.3)  | - (0.2)    | (0.2)  | - (0.55)  | (0.35) | - |
| S-amplitude in aVL, mV, median          | 0.45   | 0.3    | *** 0.45   | 0.3    | *** 0.35   | 0.2    | * 0.4     | 0.2    | * |

|                                           |        |        |     |        |        |     |        |        |    |        |        |    |
|-------------------------------------------|--------|--------|-----|--------|--------|-----|--------|--------|----|--------|--------|----|
| S-amplitude in aVL, mV, IQR               | (0.5)  | (0.45) | *** | (0.5)  | (0.45) | *** | (0.2)  | (0.35) | *  | (0.63) | (0.33) | *  |
| S-amplitude in V1, mV, median             | 0.3    | 0.4    | *** | 0.25   | 0.35   | *** | 0.3    | 0.45   | *  | 0.5    | 0.5    | -  |
| S-amplitude in V1, mV, IQR                | (0.35) | (0.4)  | *** | (0.3)  | (0.43) | *** | (0.35) | (0.35) | *  | (0.43) | (0.35) | -  |
| S-amplitude in V3, mV, median             | 0.7    | 0.6    | *   | 0.6    | 0.6    | -   | 0.85   | 0.6    | -  | 0.95   | 0.85   | -  |
| S-amplitude in V3, mV, IQR                | (0.64) | (0.54) | *   | (0.6)  | (0.5)  | -   | (0.45) | (0.45) | -  | (0.58) | (0.6)  | -  |
| S-amplitude in V4, mV, median             | 0.65   | 0.5    | *** | 0.65   | 0.55   | *** | 0.6    | 0.45   | *  | 0.5    | 0.6    | -  |
| S-amplitude in V4, mV, IQR                | (0.65) | (0.5)  | *** | (0.6)  | (0.5)  | *** | (0.65) | (0.4)  | *  | (0.55) | (0.53) | -  |
| S-amplitude in V5, mV, median             | 0.5    | 0.4    | *** | 0.55   | 0.45   | *** | 0.4    | 0.3    | ** | 0.4    | 0.3    | -  |
| S-amplitude in V5, mV, IQR                | (0.45) | (0.4)  | *** | (0.5)  | (0.45) | *** | (0.6)  | (0.3)  | ** | (0.48) | (0.38) | -  |
| S-amplitude in V6, mV, median             | 0.3    | 0.2    | *** | 0.3    | 0.25   | *** | 0.2    | 0.1    | ** | 0.1    | 0.05   | *  |
| S-amplitude in V6, mV, IQR                | (0.4)  | (0.29) | *** | (0.4)  | (0.28) | *** | (0.35) | (0.15) | ** | (0.25) | (0.18) | *  |
| R/S in V1, median                         | 1      | 0.4    | *** | 1.2    | 0.5    | **  | 0.8    | 0.3    | *  | 0.3    | 0.3    | -  |
| R/S in V1, IQR                            | (2)    | (0.8)  | *** | (2.2)  | (0.9)  | **  | (1.2)  | (0.7)  | *  | (0.3)  | (0.2)  | -  |
| R/S in V5, median                         | 1.7    | 2.4    | *** | 1.7    | 2.2    | *** | 1.9    | 3.2    | -  | 2.1    | 3      | ** |
| R/S in V5, IQR                            | (2)    | (2.7)  | *** | (1.6)  | (2.4)  | *** | (2.4)  | (3.1)  | -  | (2)    | (3.6)  | ** |
| R/S in V6, median                         | 2.4    | 3.3    | *** | 2.3    | 3      | *** | 2.6    | 6.3    | ** | 3.8    | 5.8    | *  |
| R/S in V6, IQR                            | (2.6)  | (4.4)  | *** | (2.6)  | (3.6)  | *** | (3.3)  | (9.4)  | ** | (6.2)  | (6.5)  | *  |
| R V1, 2 + S I, aVL - S V1, mV, median     | 0.6    | 0.3    | *** | 0.7    | 0.4    | *** | 0.43   | 0.2    | ** | 0.23   | 0.05   | ** |
| R V1, 2 + S I, aVL - S V1, mV, IQR        | (0.7)  | (0.65) | *** | (0.65) | (0.7)  | *** | (0.59) | (0.3)  | ** | (0.5)  | (0.4)  | ** |
| R V1 + S V5, V6, mV, median               | 0.85   | 0.65   | *** | 0.9    | 0.75   | *** | 0.6    | 0.5    | ** | 0.65   | 0.45   | -  |
| R V1 + S V5, V6, mV, IQR                  | (0.73) | (0.56) | *** | (0.75) | (0.59) | *** | (0.7)  | (0.33) | ** | (0.49) | (0.38) | -  |
| R-amplitude V1 (QRS < 120 ms), mV, median | 0.25   | 0.2    | *** | 0.3    | 0.2    | *** | 0.2    | 0.15   | *  | 0.2    | 0.1    | -  |
| R-amplitude V1 (QRS < 120 ms), mV, IQR    | (0.3)  | (0.21) | *** | (0.33) | (0.25) | *** | (0.25) | (0.2)  | *  | (0.11) | (0.11) | -  |
| R peak time V1 (QRS < 120 ms), ms, median | 50     | 43     | *** | 55     | 50     | *** | 60     | 30     | -  | 23     | 20     | -  |
| R peak time V1 (QRS < 120 ms), ms, IQR    | (30)   | (40)   | *** | (20)   | (40)   | *** | (40)   | (40)   | -  | (34)   | (13)   | -  |
| R V1, V2 + S I, V6 - S V1, mV, median     | 0.6    | 0.28   | *** | 0.7    | 0.4    | *** | 0.5    | 0.08   | ** | 0.1    | -0.05  | ** |
| R V1, V2 + S I, V6 - S V1, mV, IQR        | (0.89) | (0.7)  | *** | (0.75) | (0.75) | *** | (0.66) | (0.43) | ** | (0.25) | (0.55) | ** |

Annotation: SLI: Sokolow-Lyon-Index, IQR: interquartile range, mPAP: mean pulmonary artery pressure, -: p > 0.05, \*: p < 0.05, \*\*: p < 0.01, \*\*\*: p < 0.001

Table S19: Subgroups repolarisation parameters

|                                                | Entire cohort |           |     | mPAP ≥ 25 |           |     | mPAP = 21-24 |           |    | mPAP ≤ 20 |           |   |
|------------------------------------------------|---------------|-----------|-----|-----------|-----------|-----|--------------|-----------|----|-----------|-----------|---|
|                                                | Baseline      | Follow-up | p   | Baseline  | Follow-up | p   | Baseline     | Follow-up | p  | Baseline  | Follow-up | p |
| Longest T-wave, ms, median                     | 300           | 300       | *   | 300       | 300       | -   | 280          | 300       | -  | 300       | 280       | * |
| Longest T-wave, ms, interquartile range        | (80)          | (58)      | *   | (60)      | (40)      | -   | (80)         | (40)      | -  | (90)      | (40)      | * |
| Shortest T-wave, ms, median                    | 150           | 140       | -   | 150       | 140       | -   | 140          | 150       | -  | 140       | 140       | - |
| Shortest T-wave, ms, interquartile range       | (30)          | (20)      | -   | (30)      | (20)      | -   | (60)         | (20)      | -  | (20)      | (20)      | - |
| T-wave dispersion, ms, median                  | 140           | 140       | -   | 140       | 140       | -   | 140          | 140       | -  | 160       | 140       | - |
| T-wave dispersion, ms, interquartile range     | (80)          | (58)      | -   | (80)      | (55)      | -   | (40)         | (60)      | -  | (70)      | (50)      | - |
| T-wave inversion in II, n                      | 46            | 19        | *** | 33        | 12        | *** | 6            | 3         | -  | 4         | 1         | - |
| T-wave inversion in II, %                      | (31%)         | (13%)     | *** | (32%)     | (12%)     | *** | (24%)        | (12%)     | -  | (21%)     | (5%)      | - |
| T-wave inversion in III, n                     | 73            | 49        | *** | 54        | 37        | **  | 9            | 7         | -  | 7         | 2         | * |
| T-wave inversion in III, %                     | (49%)         | (33%)     | *** | (52%)     | (36%)     | **  | (36%)        | (28%)     | -  | (37%)     | (11%)     | * |
| T-wave inversion in aVF, n                     | 61            | 26        | *** | 47        | 20        | *** | 6            | 3         | -  | 5         | 0         |   |
| T-wave inversion in aVF, %                     | (41%)         | (17%)     | *** | (46%)     | (19%)     | *** | (24%)        | (12%)     | -  | (26%)     | (0%)      |   |
| T-wave inversion in V1, n                      | 130           | 133       | -   | 89        | 96        | -   | 23           | 22        | -  | 15        | 14        | - |
| T-wave inversion in V1, %                      | (87%)         | (89%)     | -   | (86%)     | (93%)     | -   | (92%)        | (88%)     | -  | (79%)     | (74%)     | - |
| T-wave inversion in V2, n                      | 76            | 68        | -   | 57        | 54        | -   | 12           | 8         | -  | 5         | 4         |   |
| T-wave inversion in V2, %                      | (51%)         | (45%)     | -   | (55%)     | (52%)     | -   | (48%)        | (32%)     | -  | (26%)     | (21%)     |   |
| T-wave inversion in V3, n                      | 90            | 66        | *** | 70        | 55        | **  | 13           | 6         | ** | 4         | 3         | - |
| T-wave inversion in V3, %                      | (60%)         | (44%)     | *** | (68%)     | (53%)     | **  | (52%)        | (24%)     | ** | (21%)     | (16%)     | - |
| T-wave inversions in II, III, aVF and V1-V3, n | 21            | 9         | *   | 15        | 7         | -   | 3            | 1         | -  | 1         | 0         |   |
| T-wave inversions in II, III, aVF and V1-V3, % | (14%)         | (6%)      | *   | (15%)     | (7%)      | -   | (12%)        | (4%)      | -  | (5%)      | (0%)      |   |
| T-wave inversions in II, III and aVF, n        | 46            | 18        | *** | 33        | 12        | *** | 6            | 3         | -  | 4         | 0         |   |
| T-wave inversions in II, III and aVF, %        | (31%)         | (12%)     | *** | (32%)     | (12%)     | *** | (24%)        | (12%)     | -  | (21%)     | (0%)      |   |
| T-wave inversions in V1-V3, n                  | 68            | 53        | *   | 53        | 45        | -   | 11           | 4         | *  | 2         | 3         | - |
| T-wave inversions in V1-V3, %                  | (45%)         | (35%)     | *   | (52%)     | (44%)     | -   | (44%)        | (16%)     | *  | (11%)     | (16%)     | - |

Annotation: mPAP: mean pulmonary artery pressure, -:  $p > 0.05$ , \*:  $p < 0.05$ , \*\*:  $p < 0.01$ , \*\*\*:  $p < 0.001$

Table S20: Subgroups general parameters

|                                       | Entire cohort |           |     | mPAP $\geq 25$ |           |     | mPAP = 21-24 |           |     | mPAP $\leq 20$ |           |    |
|---------------------------------------|---------------|-----------|-----|----------------|-----------|-----|--------------|-----------|-----|----------------|-----------|----|
|                                       | Baseline      | Follow-up | p   | Baseline       | Follow-up | p   | Baseline     | Follow-up | p   | Baseline       | Follow-up | p  |
| Sinusrhythm, n                        | 148           | 143       | *   | 101            | 98        | -   | 25           | 25        | /   | 19             | 17        | /  |
| Sinusrhythm, %                        | (99%)         | (95%)     | *   | (98%)          | (95%)     | -   | (100%)       | (100%)    | /   | (100%)         | (90%)     | /  |
| Normocardia, n                        | 123           | 131       | -   | 84             | 88        | -   | 20           | 23        | -   | 18             | 18        | -  |
| Normocardia, %                        | (82%)         | (87%)     | -   | (82%)          | (85%)     | -   | (80%)        | (92%)     | -   | (95%)          | (95%)     | -  |
| Bradycardia, n                        | 3             | 9         | -   | 2              | 6         | -   | 1            | 2         | -   | 0              | 1         | /  |
| Bradycardia, %                        | (2%)          | (6%)      | -   | (2%)           | (6%)      | -   | (4%)         | (8%)      | -   | (0%)           | (5%)      | /  |
| Tachycardia, n                        | 24            | 10        | **  | 17             | 9         | -   | 4            | 0         | /   | 1              | 0         | /  |
| Tachycardia, %                        | (16%)         | (7%)      | **  | (17%)          | (9%)      | -   | (16%)        | (0%)      | /   | (5%)           | (0%)      | /  |
| First-degree AV block, n              | 6             | 4         | -   | 6              | 4         | -   | 0            | 0         | /   | 0              | 0         | /  |
| First-degree AV block, %              | (4%)          | (3%)      | -   | (6%)           | (4%)      | -   | (0%)         | (0%)      | /   | (0%)           | (0%)      | /  |
| Myocardial infarction, n              | 6             | 6         | /   | 5              | 5         | /   | 1            | 1         | /   | 0              | 0         | /  |
| Myocardial infarction, %              | (4%)          | (4%)      | /   | (5%)           | (5%)      | /   | (4%)         | (4%)      | /   | (0%)           | (0%)      | /  |
| Heart rate, bpm, median               | 84            | 78        | *** | 84             | 79        | *** | 86           | 79        | *   | 77             | 72        | ** |
| Heart rate, bpm, IQR                  | (21.8)        | (19)      | *** | (20)           | (19)      | *** | (20)         | (16)      | *   | (19.5)         | (11)      | ** |
| PQ-interval, ms, median               | 150           | 150       | -   | 150            | 150       | -   | 150          | 150       | -   | 140            | 140       | -  |
| PQ-interval, ms, IQR                  | (29)          | (25)      | -   | (20)           | (23)      | -   | (28)         | (28)      | -   | (30)           | (30)      | -  |
| PR-interval, ms, median               | 160           | 145       | /   | 160            | 170       | /   | 120          | 175       | /   | 150            | 120       | /  |
| PR-interval, ms, IQR                  | (20)          | (41)      | /   | (8)            | (30)      | /   | /            | (25)      | /   | (30)           | (10)      | /  |
| QT-interval, ms, median               | 390           | 380       | *** | 400            | 380       | **  | 380          | 370       | *   | 400            | 370       | -  |
| QT-interval, ms, IQR                  | (70)          | (40)      | *** | (80)           | (50)      | **  | (50)         | (40)      | *   | (40)           | (30)      | -  |
| QTc-interval (Bazett), ms, median     | 454           | 432       | *** | 459            | 436       | *** | 452          | 412       | *** | 432            | 399       | ** |
| QTc-interval (Bazett), ms, IQR        | (85)          | (44)      | *** | (88)           | (44)      | *** | (79)         | (35)      | *** | (45)           | (30)      | ** |
| QTc-interval (Fridericia), ms, median | 428           | 413       | *** | 439            | 419       | *** | 428          | 397       | *** | 415            | 392       | ** |
| QTc-interval (Fridericia), ms, IQR    | (77)          | (43)      | *** | (92)           | (42)      | *** | (49)         | (35)      | *** | (38)           | (30)      | ** |
| QTc-interval (Hodges), ms, median     | 428           | 414       | *** | 435            | 418       | *** | 428          | 399       | *** | 416            | 391       | ** |
| QTc-interval (Hodges), ms, IQR        | (69)          | (39)      | *** | (78)           | (35)      | *** | (53)         | (33)      | *** | (32)           | (27)      | ** |



|                                       |      |      |     |      |      |    |      |      |   |      |      |   |
|---------------------------------------|------|------|-----|------|------|----|------|------|---|------|------|---|
| QTc-interval (Framingham), ms, median | 390  | 380  | *** | 400  | 380  | ** | 380  | 370  | * | 400  | 370  | - |
| QTc-interval (Framingham), ms, IQR    | (70) | (40) | *** | (80) | (50) | ** | (50) | (40) | * | (40) | (30) | - |

Annotation: mPAP: mean pulmonary artery pressure, IQR: interquartile range, -: p > 0.05, \*: p < 0.05, \*\*: p < 0.01, \*\*\*: p < 0.001

Table S21: Subgroups correlations between electrocardiographic and haemodynamic parameters - Baseline

| Parameter 1                      | Parameter 2 | Entire cohort |         | mPAP ≥ 25 |         | mPAP = 21-24 |         | mPAP ≤ 20 |        |
|----------------------------------|-------------|---------------|---------|-----------|---------|--------------|---------|-----------|--------|
|                                  |             | r             | p       | r         | p       | r            | p       | r         | p      |
| Heart rate                       | mPAP        |               |         |           |         | 0.405        | < 0.05  |           |        |
| Longest P-wave                   | mPAP        |               |         |           |         |              |         | -0.589    | < 0.01 |
| PQ-interval                      | mPAP        |               |         |           |         |              |         | -0.502    | < 0.05 |
| R-amplitude in I                 | mPAP        |               |         |           |         | -0.705       | < 0.001 |           |        |
| R-amplitude in III               | mPAP        |               |         |           |         | 0.451        | < 0.05  |           |        |
| R-amplitude in aVR               | mPAP        |               |         |           |         | -0.637       | < 0.001 |           |        |
| R-amplitude in V1                | mPAP        | 0.473         | < 0.001 | 0.369     | < 0.001 | 0.427        | < 0.05  |           |        |
| S-amplitude in I                 | mPAP        | 0.474         | < 0.001 | 0.415     | < 0.001 | 0.440        | < 0.05  |           |        |
| S-amplitude in aVL               | mPAP        |               |         |           |         | 0.404        | < 0.05  |           |        |
| S-amplitude in V1                | mPAP        | -0.401        | < 0.001 |           |         | -0.643       | < 0.001 |           |        |
| S-amplitude in V4                | mPAP        |               |         |           |         | 0.705        | < 0.001 |           |        |
| S-amplitude in V5                | mPAP        | 0.344         | < 0.001 | 0.330     | < 0.001 | 0.468        | < 0.05  |           |        |
| S-amplitude in V6                | mPAP        | 0.419         | < 0.001 | 0.314     | < 0.01  | 0.566        | < 0.01  |           |        |
| R/S in V1                        | mPAP        | 0.464         | < 0.001 |           |         | 0.660        | < 0.01  |           |        |
| R/S in V6                        | mPAP        | -0.328        | < 0.001 |           |         |              |         |           |        |
| R/S in V5 : R/S in V1            | mPAP        | -0.434        | < 0.001 |           |         | -0.524       | < 0.05  |           |        |
| (RI + SIII) - (SI + RIII)        | mPAP        | -0.331        | < 0.001 |           |         | -0.670       | < 0.001 |           |        |
| R V1, V2 + S I, aVL - S V1       | mPAP        | 0.519         | < 0.001 | 0.392     | < 0.001 | 0.609        | < 0.01  |           |        |
| R V1, V2 + S I, V6 - S V1        | mPAP        | 0.524         | < 0.001 | 0.420     | < 0.001 | 0.555        | < 0.01  |           |        |
| R V1 + S V5, V6                  | mPAP        | 0.471         | < 0.001 | 0.411     | < 0.001 | 0.604        | < 0.01  |           |        |
| R-amplitude in V1 (QRS < 120 ms) | mPAP        | 0.458         | < 0.001 | 0.408     | < 0.001 |              |         |           |        |
| R peak time in V1 (QRS < 120 ms) | mPAP        | 0.324         | < 0.001 |           |         |              |         |           |        |
| QTc-interval (Bazett)            | mPAP        | 0.328         | < .001  |           |         | 0.611        | < 0.01  |           |        |

|                                  |      |        |        |        |        |        |        |        |       |
|----------------------------------|------|--------|--------|--------|--------|--------|--------|--------|-------|
| QTc-interval (Fridericia)        | mPAP |        |        |        |        | 0.539  | <0.01  |        |       |
| QTc-interval (Hodges)            | mPAP |        |        |        |        | 0.595  | <0.01  |        |       |
| Longest T-wave                   | mPAP |        |        |        |        |        |        | 0.468  | <0.05 |
| T-wave dispersion                | mPAP |        |        |        |        |        |        | 0.466  | <0.05 |
| Heart rate                       | PVR  |        |        |        |        | 0.459  | <0.05  |        |       |
| Highest P-wave                   | PVR  | 0.312  | <0.001 | 0.313  | <0.01  |        |        |        |       |
| Longest P-wave                   | PVR  |        |        |        |        |        |        | -0.620 | <0.01 |
| R-amplitude in I                 | PVR  |        |        |        |        | -0.705 | <0.001 | -0.631 | <0.01 |
| R-amplitude in aVR               | PVR  |        |        |        |        | -0.734 | <0.001 |        |       |
| R-amplitude in V1                | PVR  | 0.522  | <0.001 | 0.406  | <0.001 | 0.498  | <0.05  | 0.482  | <0.05 |
| S-amplitude in I                 | PVR  | 0.372  | <0.001 | 0.340  | <0.001 |        |        |        |       |
| S-amplitude in aVL               | PVR  |        |        | 0.308  | <0.01  |        |        |        |       |
| S-amplitude in V1                | PVR  | -0.409 | <0.001 |        |        | -0.582 | <0.01  |        |       |
| S-amplitude in V4                | PVR  |        |        |        |        | 0.672  | <0.001 |        |       |
| S-amplitude in V5                | PVR  | 0.322  | <0.001 |        |        | 0.484  | <0.05  |        |       |
| S-amplitude in V6                | PVR  | 0.441  | <0.001 | 0.333  | <0.001 | 0.605  | <0.01  |        |       |
| R/S in V1                        | PVR  | 0.518  | <0.001 | 0.394  | <0.001 | 0.702  | <0.001 |        |       |
| R/S in V5                        | PVR  |        |        |        |        | -0.473 | <0.05  |        |       |
| R/S in V6                        | PVR  | -0.384 | <0.001 |        |        | -0.595 | <0.01  |        |       |
| R/S in V5 : R/S in V1            | PVR  | -0.501 | <0.001 | -0.398 | <0.001 | -0.620 | <0.01  |        |       |
| R V1, V2 + S I, aVL - S V1       | PVR  | 0.491  | <0.001 | 0.400  | <0.001 | 0.498  | <0.05  |        |       |
| R V1, V2 + S I, V6 - S V1        | PVR  | 0.516  | <0.001 | 0.434  | <0.001 | 0.527  | <0.01  |        |       |
| R V1 + S V5, V6                  | PVR  | 0.472  | <0.001 | 0.393  | <0.001 | 0.623  | <0.01  |        |       |
| R-amplitude in V1 (QRS < 120 ms) | PVR  | 0.496  | <0.001 | 0.413  | <0.001 |        |        |        |       |
| R peak time in V1 (QRS < 120 ms) | PVR  | 0.306  | <0.001 |        |        |        |        |        |       |
| QT-interval                      | PVR  |        |        | 0.326  | <0.01  |        |        |        |       |
| QTc-interval (Bazett)            | PVR  | 0.447  | <.001  | 0.398  | <0.001 | 0.569  | <0.01  |        |       |
| QTc-interval (Fridericia)        | PVR  | 0.384  | <.001  | 0.373  | <0.001 | 0.454  | <0.05  |        |       |
| QTc-interval (Hodges)            | PVR  | 0.419  | <0.001 | 0.387  | <0.001 | 0.529  | <0.01  |        |       |
| QTc-interval (Framingham)        | PVR  |        |        | 0.335  | <0.001 |        |        |        |       |

|                                  |     |        |         |        |         |        |         |        |        |
|----------------------------------|-----|--------|---------|--------|---------|--------|---------|--------|--------|
| T-wave dispersion                | PVR |        |         |        |         | 0.440  | < 0.05  |        |        |
| Heart rate                       | RAP |        |         |        |         | 0.468  | < 0.05  |        |        |
| P-wave amplitude in II           | RAP |        |         |        |         | 0.610  | < 0.01  | 0.497  | < 0.05 |
| Highest P-wave                   | RAP |        |         |        |         | 0.610  | < 0.01  | 0.497  | < 0.05 |
| R-amplitude in I                 | RAP |        |         |        |         | -0.519 | < 0.01  |        |        |
| R-amplitude in aVR               | RAP |        |         |        |         | -0.464 | < 0.05  | -0.510 | < 0.05 |
| R-amplitude in V2                | RAP |        |         |        |         |        |         | -0.510 | < 0.05 |
| S-amplitude in V3                | RAP | -0.311 | < 0.001 | -0.319 | < 0.01  |        |         |        |        |
| S-amplitude in V6                | RAP | 0.315  | < 0.001 |        |         |        |         |        |        |
| R/S in V1                        | RAP |        |         |        |         | 0.458  | < 0.05  |        |        |
| R/S in V5                        | RAP |        |         |        |         |        |         | -0.635 | < 0.05 |
| R/S in V6                        | RAP | -0.350 | < 0.001 | -0.312 | < 0.01  |        |         |        |        |
| (RI + SIII) - (SI + RIII)        | RAP |        |         |        |         | -0.519 | < 0.01  |        |        |
| R V1, V2 + S I, aVL - S V1       | RAP |        |         |        |         | 0.601  | < 0.01  |        |        |
| R V1, V2 + S I, V6 - S V1        | RAP |        |         |        |         | 0.549  | < 0.01  |        |        |
| R V1 + S V5, V6                  | RAP |        |         |        |         | 0.446  | < 0.05  |        |        |
| R-amplitude in V1 (QRS < 120 ms) | RAP |        |         | 0.313  | < 0.01  |        |         |        |        |
| R peak time in V1 (QRS < 120 ms) | RAP | 0.304  | < 0.001 | 0.420  | < 0.001 |        |         |        |        |
| QTc-interval (Bazett)            | RAP |        |         |        |         | 0.671  | < 0.001 |        |        |
| QTc-interval (Fridericia)        | RAP |        |         |        |         | 0.591  | < 0.01  |        |        |
| QTc-interval (Hodges)            | RAP |        |         |        |         | 0.655  | < 0.001 |        |        |
| R-amplitude in I                 | CO  |        |         |        |         |        |         | 0.608  | < 0.01 |
| R-amplitude in III               | CO  |        |         |        |         | 0.453  | < 0.05  |        |        |
| R-amplitude in aVR               | CO  |        |         |        |         | 0.508  | < 0.05  |        |        |
| R-amplitude in V1                | CO  |        |         |        |         |        |         | -0.536 | < 0.05 |
| R/S in V1                        | CO  |        |         |        |         | -0.506 | < 0.05  |        |        |
| R/S in V6                        | CO  |        |         |        |         | 0.471  | < 0.05  |        |        |
| R/S in V5 : R/S in V1            | CO  |        |         |        |         | 0.472  | < 0.05  |        |        |
| QTc-interval (Hodges)            | CO  |        |         | -0.300 | < 0.01  |        |         |        |        |

Annotation: r = 0.30 – 0.49, r = 0.50 – 0.69, r = 0.70 – 0.89, mPAP: mean pulmonary artery pressure, PVR: pulmonary vascular resistance, RAP: right atrial pressure, CO: cardiac output

Table S22: Subgroups correlations between electrocardiographic and haemodynamic parameters - Follow-up

| Parameter 1                | Parameter 2 | Entire cohort |        | mPAP ≥ 25 |       | mPAP = 21-24 |       | mPAP ≤ 20 |       |
|----------------------------|-------------|---------------|--------|-----------|-------|--------------|-------|-----------|-------|
|                            |             | r             | p      | r         | p     | r            | p     | r         | p     |
| PQ-interval                | mPAP        |               |        |           |       |              |       | 0.681     | <0.01 |
| R-amplitude in I           | mPAP        |               |        |           |       | -0.484       | <0.05 |           |       |
| R-amplitude in V2          | mPAP        |               |        |           |       | -0.416       | <0.05 |           |       |
| S-amplitude in I           | mPAP        | 0.356         | <0.001 |           |       |              |       |           |       |
| S-amplitude in V1          | mPAP        | -0.337        | <0.001 |           |       |              |       |           |       |
| S-amplitude in V4          | mPAP        |               |        |           |       | 0.417        | <0.05 |           |       |
| S-amplitude in V6          | mPAP        | 0.408         | <0.001 |           |       |              |       |           |       |
| R/S in V1                  | mPAP        | 0.350         | <0.001 |           |       |              |       |           |       |
| R/S in V5 : R/S in V1      | mPAP        | -0.359        | <0.001 | -0.341    | <0.01 |              |       |           |       |
| R V1, V2 + S I, aVL - S V1 | mPAP        | 0.407         | <0.001 |           |       |              |       |           |       |
| R V1, V2 + S I, V6 - S V1  | mPAP        | 0.423         | <0.001 |           |       |              |       |           |       |
| R V1 + S V5, V6            | mPAP        | 0.342         | <0.001 |           |       |              |       |           |       |
| QTc-interval (Bazett)      | mPAP        | 0.322         | <.001  |           |       |              |       |           |       |
| QTc-interval (Hodges)      | mPAP        | 0.318         | <0.001 |           |       |              |       |           |       |
| R-amplitude in V2          | PVR         |               |        |           |       |              |       | -0.523    | <0.05 |
| S-amplitude in I           | PVR         | 0.329         | <0.001 |           |       |              |       |           |       |
| S-amplitude in V1          | PVR         | -0.344        | <0.001 |           |       |              |       |           |       |
| S-amplitude in V6          | PVR         | 0.394         | <0.001 |           |       |              |       |           |       |
| R/S in V1                  | PVR         | 0.335         | <0.001 |           |       |              |       |           |       |
| R/S in V6                  | PVR         | -0.305        | <0.001 |           |       |              |       |           |       |
| R/S in V5 : R/S in V1      | PVR         | -0.336        | <0.001 | -0.324    | <0.01 |              |       |           |       |
| R V1, V2 + S I, aVL - S V1 | PVR         | 0.372         | <0.001 |           |       |              |       |           |       |
| R V1, V2 + S I, V6 - S V1  | PVR         | 0.393         | <0.001 |           |       |              |       |           |       |
| QTc-interval (Bazett)      | PVR         | 0.357         | <0.001 |           |       |              |       |           |       |
| QTc-interval (Fridericia)  | PVR         | 0.315         | <0.001 |           |       |              |       |           |       |
| Longest T-wave             | PVR         |               |        |           |       | 0.436        | <0.05 |           |       |

|                       |     |        |        |       |       |
|-----------------------|-----|--------|--------|-------|-------|
| T-wave dispersion     | PVR | 0.428  | <0.05  |       |       |
| PQ-interval           | RAP |        |        | 0.672 | <0.01 |
| R-amplitude in I      | RAP | 0.476  | <0.05  |       |       |
| R-amplitude in III    | RAP | 0.480  | <0.05  |       |       |
| R-amplitude in aVR    | RAP | 0.733  | <0.001 |       |       |
| S-amplitude in V3     | RAP | 0.422  | <0.05  |       |       |
| S-amplitude in III    | CO  | -0.436 | <0.05  |       |       |
| R/S in V1             | CO  | -0.494 | <0.05  | 0.560 | <0.05 |
| R/S in V5 : R/S in V1 | CO  | 0.473  | <0.05  |       |       |
| Longest T-wave        | CO  | -0.425 | <0.05  |       |       |
| T-wave dispersion     | CO  | -0.417 | <0.05  |       |       |

Annotation:  $r = 0.30 - 0.49$ ,  $r = 0.50 - 0.69$ ,  $r = 0.70 - 0.89$ , mPAP: mean pulmonary artery pressure, PVR: pulmonary vascular resistance, RAP: right atrial pressure, CO: cardiac output

Table S23: Subgroups correlations between changes in electrocardiographic and changes in haemodynamic parameters

| Parameter 1                | Parameter 2 | Entire cohort |        | mPAP $\geq 25$ |        | mPAP = 21-24 |        | mPAP $\leq 20$ |       |
|----------------------------|-------------|---------------|--------|----------------|--------|--------------|--------|----------------|-------|
|                            |             | r             | p      | r              | p      | r            | p      | r              | p     |
| Heart rate                 | mPAP        |               |        |                |        | 0.406        | <0.05  | 0.525          | <0.05 |
| P-wave amplitude in II     | mPAP        | 0.379         | <0.001 | 0.366          | <0.001 |              |        | 0.500          | <0.05 |
| Highest P-wave             | mPAP        | 0.407         | <0.001 | 0.407          | <0.001 |              |        | 0.500          | <0.05 |
| R-amplitude in III         | mPAP        |               |        |                |        |              |        | 0.472          | <0.05 |
| R-amplitude in aVR         | mPAP        |               |        |                |        | -0.525       | <0.01  |                |       |
| R-amplitude in V2          | mPAP        | 0.383         | <0.001 | 0.414          | <0.001 |              |        | 0.516          | <0.05 |
| R-amplitude in V6          | mPAP        |               |        |                |        | -0.464       | <0.05  |                |       |
| S-amplitude in V1          | mPAP        |               |        |                |        | -0.745       | <0.001 |                |       |
| S-amplitude in V4          | mPAP        |               |        |                |        | 0.514        | <0.01  |                |       |
| S-amplitude in V6          | mPAP        |               |        |                |        | 0.451        | <0.05  |                |       |
| R/S in V1                  | mPAP        |               |        |                |        | 0.715        | <0.001 |                |       |
| R/S in V6                  | mPAP        | -0.381        | <0.001 | -0.403         | <0.001 |              |        |                |       |
| R V1, V2 + S I, aVL - S V1 | mPAP        | 0.488         | <0.001 | 0.415          | <0.001 | 0.817        | <0.001 |                |       |
| R V1, V2 + S I, V6 - S V1  | mPAP        | 0.482         | <0.001 | 0.426          | <0.001 | 0.749        | <0.001 |                |       |

|                                  |      |        |         |        |         |        |         |       |        |
|----------------------------------|------|--------|---------|--------|---------|--------|---------|-------|--------|
| R-amplitude in V1 (QRS < 120 ms) | mPAP |        |         | 0.309  | < 0.01  |        |         |       |        |
| QT-interval                      | mPAP |        |         |        |         | 0.426  | < 0.05  |       |        |
| QTc-interval (Bazett)            | mPAP | 0.302  | < 0.001 |        |         | 0.681  | < 0.001 |       |        |
| QTc-interval (Fridericia)        | mPAP |        |         |        |         | 0.639  | < 0.001 |       |        |
| QTc-interval (Hodges)            | mPAP |        |         |        |         | 0.673  | < 0.001 |       |        |
| QTc-interval (Framingham)        | mPAP |        |         |        |         | 0.455  | < 0.05  |       |        |
| Heart rate                       | PVR  |        |         |        |         | 0.402  | < 0.05  | 0.512 | < 0.05 |
| P-wave amplitude in II           | PVR  | 0.339  | < 0.001 | 0.359  | < 0.001 |        |         |       |        |
| Highest P-wave                   | PVR  | 0.397  | < 0.001 | 0.442  | < 0.001 |        |         |       |        |
| Shortest P-wave                  | PVR  |        |         | 0.339  | < 0.001 |        |         |       |        |
| R-amplitude in V1                | PVR  | 0.422  | < 0.001 |        |         | 0.541  | < 0.01  |       |        |
| R-amplitude in V2                | PVR  | 0.335  | < 0.001 | 0.388  | < 0.001 |        |         |       |        |
| R-amplitude in V6                | PVR  | -0.387 | < 0.001 | -0.421 | < 0.001 | -0.478 | < 0.05  |       |        |
| S-amplitude in III               | PVR  |        |         |        |         | 0.560  | < 0.01  |       |        |
| S-amplitude in V1                | PVR  |        |         |        |         | -0.655 | < 0.001 |       |        |
| S-amplitude in V3                | PVR  |        |         |        |         |        |         | 0.526 | < 0.05 |
| S-amplitude in V4                | PVR  | 0.309  | < 0.001 |        |         | 0.664  | < 0.001 |       |        |
| S-amplitude in V5                | PVR  |        |         |        |         | 0.405  | < 0.05  |       |        |
| S-amplitude in V6                | PVR  | 0.322  | < 0.001 |        |         | 0.577  | < 0.01  |       |        |
| R/S in V1                        | PVR  | 0.454  | < 0.001 | 0.442  | < 0.001 | 0.688  | < 0.001 |       |        |
| R/S in V5                        | PVR  | -0.305 | < 0.001 |        |         | -0.465 | < 0.05  |       |        |
| R/S in V6                        | PVR  | -0.419 | < 0.001 | -0.443 | < 0.001 |        |         |       |        |
| R/S in V5 : R/S in V1            | PVR  | -0.357 | < 0.001 | -0.312 | < 0.01  | -0.608 | < 0.01  |       |        |
| R V1, V2 + S I, aVL - S V1       | PVR  | 0.418  | < 0.001 | 0.394  | < 0.001 | 0.601  | < 0.01  |       |        |
| R V1, V2 + S I, V6 - S V1        | PVR  | 0.494  | < 0.001 | 0.481  | < 0.001 | 0.697  | < 0.001 |       |        |
| R V1 + S V5, V6                  | PVR  | 0.360  | < 0.001 | 0.335  | < 0.01  | 0.556  | < 0.01  |       |        |
| R-amplitude in V1 (QRS < 120 ms) | PVR  | 0.493  | < 0.001 | 0.524  | < 0.001 | 0.501  | < 0.05  |       |        |
| R peak time in V1 (QRS < 120 ms) | PVR  | 0.306  | < 0.001 |        |         | 0.444  | < 0.05  |       |        |
| QTc-interval (Bazett)            | PVR  |        |         | 0.341  | < 0.001 | 0.595  | < 0.01  |       |        |
| QTc-interval (Fridericia)        | PVR  |        |         |        |         | 0.548  | < 0.01  |       |        |

|                                  |     |        |         |        |         |        |        |        |        |
|----------------------------------|-----|--------|---------|--------|---------|--------|--------|--------|--------|
| QTc-interval (Hodges)            | PVR |        |         |        |         | 0.594  | < 0.01 |        |        |
| P-wave amplitude in II           | RAP |        |         |        |         | 0.492  | < 0.05 |        |        |
| Highest P-wave                   | RAP |        |         |        |         | 0.492  | < 0.05 |        |        |
| QRS-interval                     | RAP |        |         |        |         |        |        | -0.590 | < 0.05 |
| S-amplitude in aVL               | RAP |        |         |        |         |        |        | -0.523 | < 0.05 |
| S-amplitude in V4                | RAP |        |         |        |         | 0.476  | < 0.05 |        |        |
| R/S in V1                        | RAP |        |         |        |         | 0.586  | < 0.05 |        |        |
| R V1, V2 + S I, aVL - S V1       | RAP |        |         |        |         | 0.447  | < 0.05 |        |        |
| R V1, V2 + S I, V6 - S V1        | RAP |        |         |        |         | 0.547  | < 0.01 |        |        |
| QTc-interval (Bazett)            | RAP |        |         |        |         | 0.590  | < 0.01 |        |        |
| QTc-interval (Fridericia)        | RAP |        |         |        |         | 0.456  | < 0.05 |        |        |
| QTc-interval (Hodges)            | RAP |        |         |        |         | 0.490  | < 0.05 |        |        |
| Heart rate                       | CO  |        |         |        |         |        |        | -0.497 | < 0.05 |
| R-amplitude in V1                | CO  |        |         |        |         | -0.447 | < 0.05 |        |        |
| R-amplitude in V6                | CO  | 0.318  | < 0.001 | 0.342  | < 0.001 |        |        |        |        |
| S-amplitude in III               | CO  |        |         |        |         | -0.590 | < 0.01 |        |        |
| S-amplitude in V6                | CO  |        |         |        |         | -0.552 | < 0.01 |        |        |
| R/S in V1                        | CO  | -0.335 | < 0.001 | -0.374 | < 0.01  |        |        |        |        |
| R/S in V5 : R/S in V1            | CO  |        |         |        |         | 0.529  | < 0.05 |        |        |
| R peak time in V1 (QRS < 120 ms) | CO  |        |         |        |         | -0.496 | < 0.05 |        |        |
| QT-interval                      | CO  |        |         |        |         |        |        | 0.554  | < 0.05 |
| QTc-interval (Framingham)        | CO  |        |         |        |         |        |        | 0.515  | < 0.05 |

Annotation:  $r = 0.30 - 0.49$ ,  $r = 0.50 - 0.69$ ,  $r = 0.70 - 0.89$ , mPAP: mean pulmonary artery pressure, PVR: pulmonary vascular resistance, RAP: right atrial pressure, CO: cardiac output
